# Supplementary material
Source: PubMed Central journal article supplement (PMC7283689)

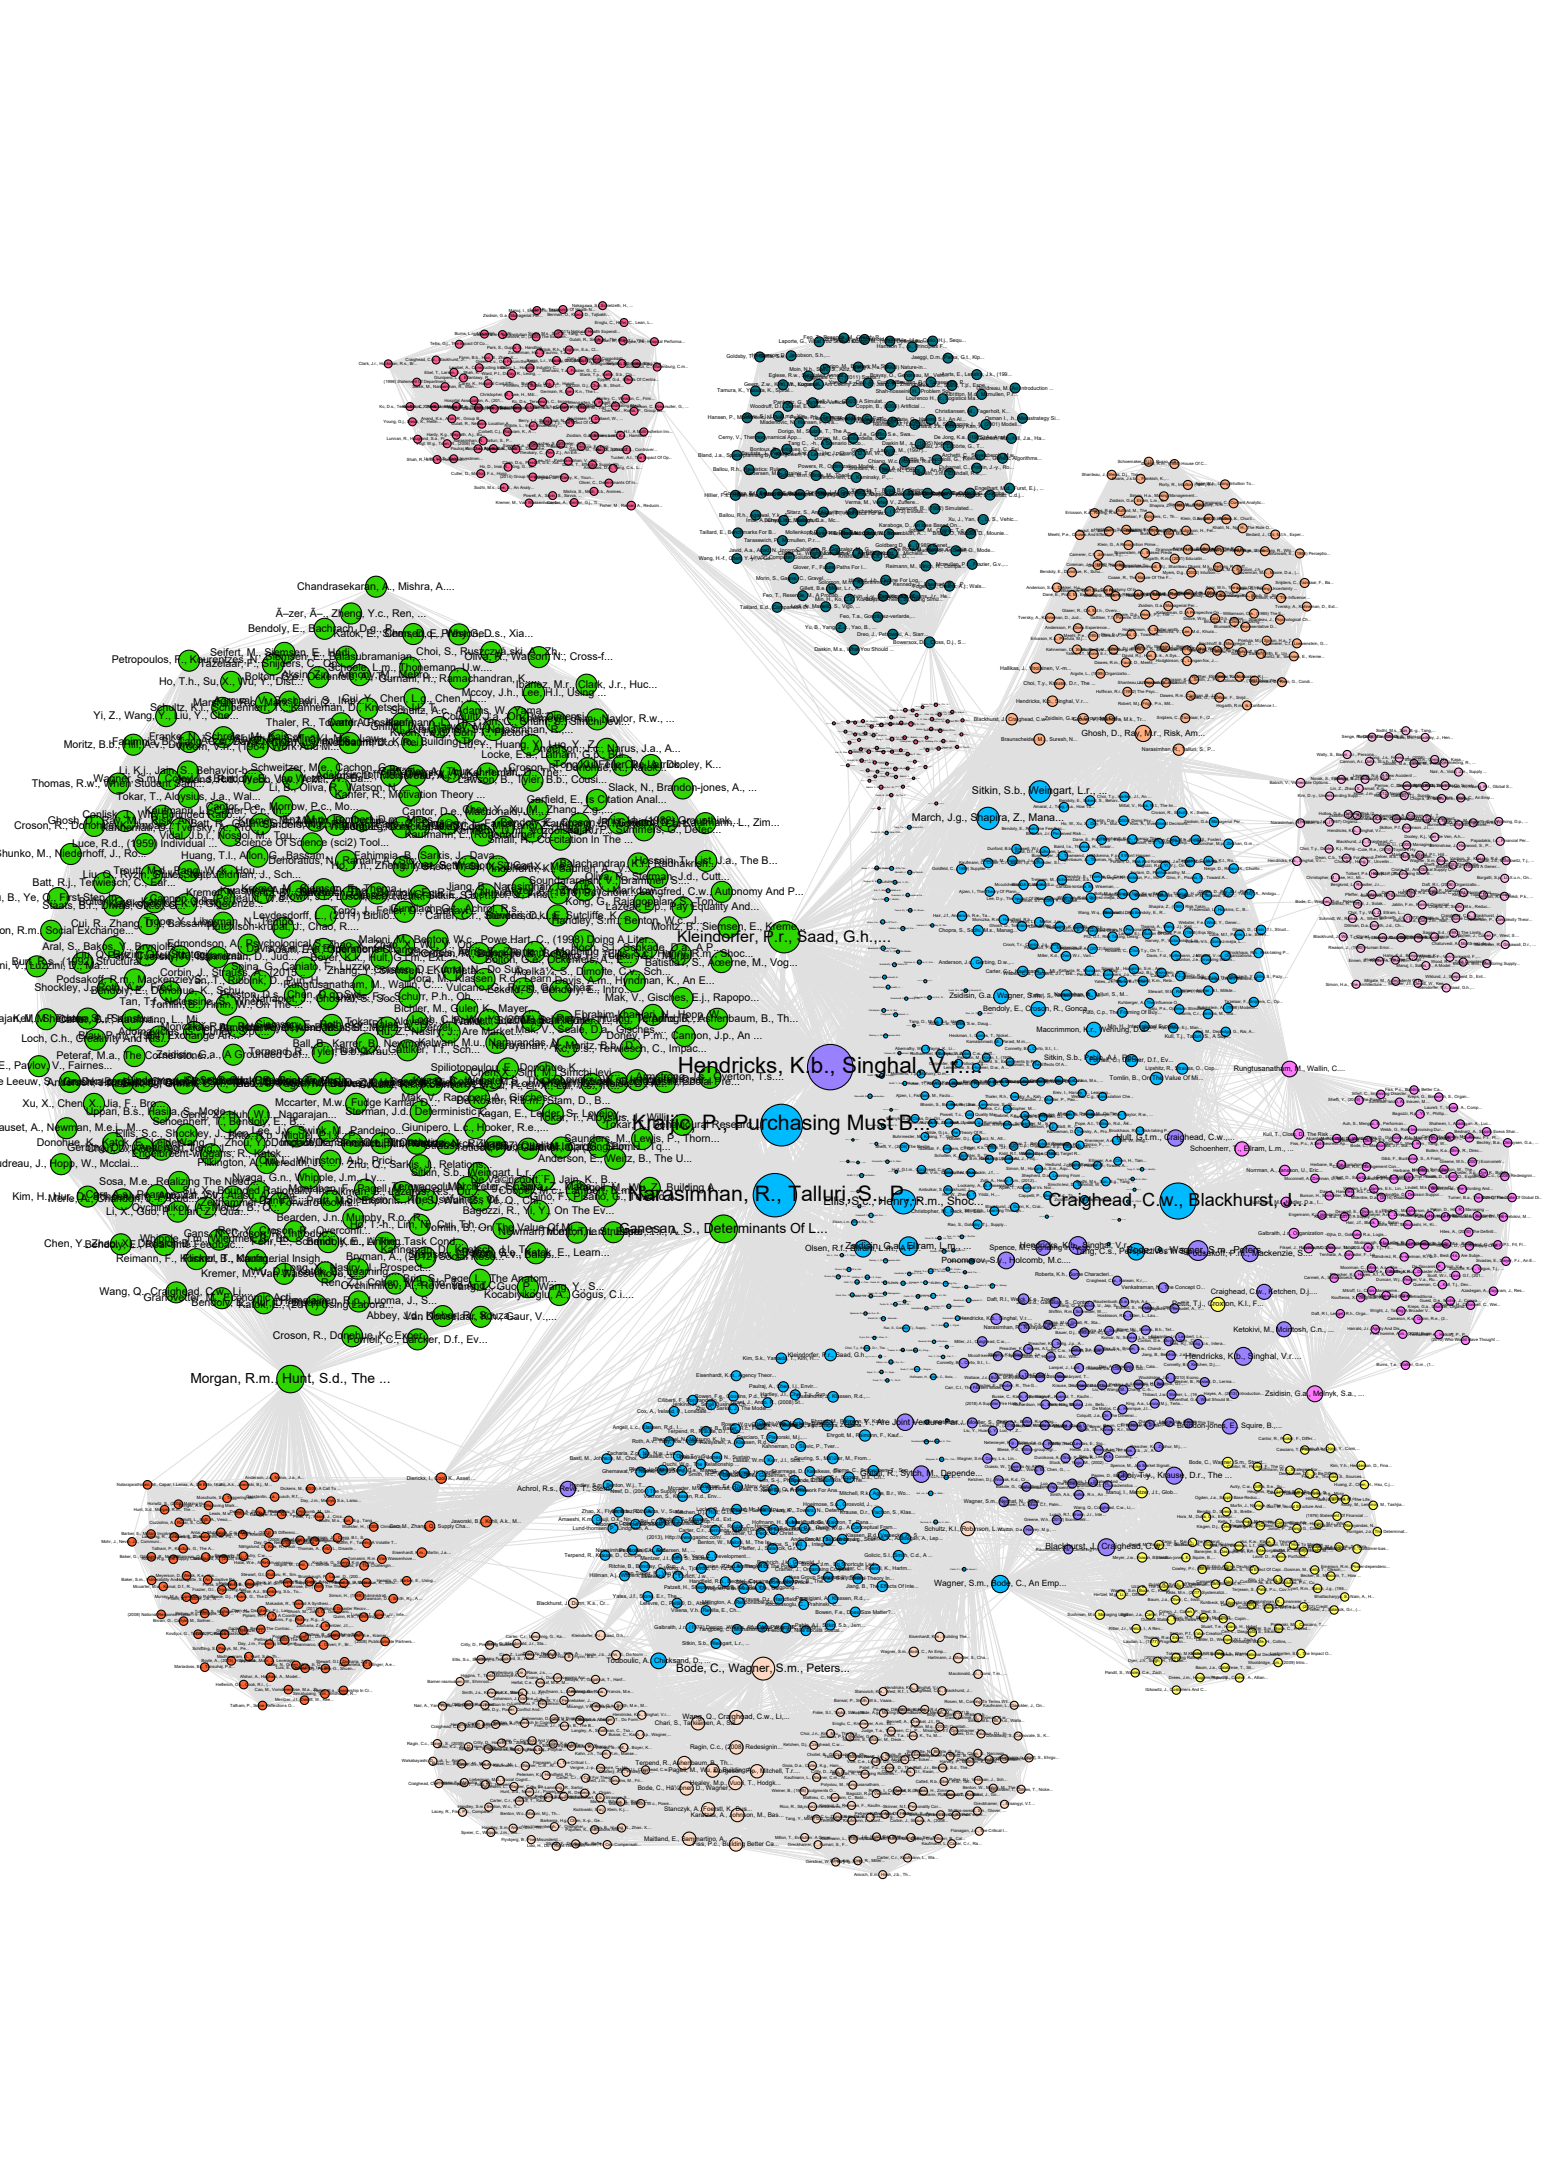

Supplement: DECI-51-867-s003.pdf [file DECI-51-867-s003.pdf]
